# Supplementary material
Source: PubMed Central journal article supplement (PMC5321217)
Supplement: supp_R072231_SUPPLEMENTAL_INFORMATION_fh_102416.pdf [file supp_R072231_SUPPLEMENTAL_INFORMATION_fh_102416.pdf]

**SUPPLEMENTAL INFORMATION:**

| <b>Ethnicities</b>     | <b>FH related terms</b>                    |
|------------------------|--------------------------------------------|
| African-American       | Aortic valvular lesions                    |
| Ameri-Indian           | Apolipoprotein B mutation                  |
| Asian                  | Arcus senilis                              |
| Asian-American         | Cascade screening                          |
| Black                  | Cerebral vascular accident                 |
| Continental ancestry   | Coronary artery disease                    |
| Ethnic groups          | Familial hypercholesterolemia              |
| Hispanic-American      | Founder effect                             |
| Hispanic/Latino        | Heterozygous familial hypercholesterolemia |
| Indian                 | Homozygous familial hypercholesterolemia   |
| Minority groups        | Hyperlipoproteinemia type II               |
| Native-American        | LDL receptor mutation                      |
| Oceanic ancestry group | PCSK9 mutation                             |
| Pacific islander       | Premature cardiac disease                  |
|                        | Severe hypercholesterolemia                |
|                        | Stroke                                     |
|                        | Xanthomas                                  |

**Supplemental Table S1:** MeSH terms applied in search strategy

**Search Strategy:** For the identification of suitable publications for our analysis we followed the PRISMA Statement. Data collection and analysis were performed from January to July 2016 from PubMed and SciELO. Identified records were published between 1982 and 2016. All publications in English and Spanish were obtained in full-version and were considered for our analysis. Publications in languages different to English or Spanish were reviewed, and excluded due to non-compliance of the inclusion criteria. Every ethnicity that was considered of interest for the publication was searched with every FH related term, obtaining a total of 19,658 identified records. Posterior to reviewing in detail and exclusion

according to the variables of interest, a total of 30 articles were included in this review. Publications of the following countries were identified and included: Argentina, Bolivia, Brazil, Chile, Colombia, Costa Rica, Cuba, Dominican Republic, Ecuador, El Salvador, French Guiana, Guadeloupe, Guatemala, Haiti, Honduras, Mexico, Nicaragua, Panama, Paraguay, Peru, Puerto Rico, Saint Barthel, Saint Martin, Uruguay, Venezuela, Portugal, Spain, and United States of America.

| Variables of Interest                 |
|---------------------------------------|
| Age                                   |
| CHD (%)                               |
| CHD Fam Hist (%)                      |
| Country                               |
| FH Diagnosis                          |
| Follow-up in years                    |
| HeFh and HoFH                         |
| Male (%)                              |
| Mean Cholesterol at Diagnosis (mg/dL) |
| Mean LDL-c at Diagnosis (mg/dL)       |
| Mutation Reported                     |
| Patients under treatment with statins |
| Presence of xanthomas (%)             |
| Reference and Publication Year        |
| Sample Size                           |
| Study Type                            |

**Supplemental Table S2:** Identified variables of interest for inclusion of publications

**Inclusion criteria:** All publications found to include any of the previous ethnicities, plus any of the FH related terms were included. For the analysis of the included publications, data containing the variables of interest was obtained for the purpose of this review.
